# Supplementary material for: Timing of Interleukin-4 Stimulation of Macrophages Determines Their Anti-Microbial Activity during Infection with Salmonella enterica Serovar Typhimurium
Source: MDPI journal article supplement (doi:10.3390/cells12081164), 2023-04-14
Supplement: s1 [file s1]

## SUPPLEMENTAL INFORMATION

### Supplementary Materials

#### **Chemicals**

Methanol, acetonitrile, and water (all HPLC grade) were obtained from Honeywell (Seelze, Germany). Triethylamine, phenyl isothiocyanate, acetic acid, putrescine, spermidine, spermine, L-arginine (as part of the amino acid standard A9906), as well as the internal standards arginine- $^{13}\text{C}_6$ , methionine- $^{13}\text{C}_5$ ,  $^{15}\text{N}$ , and serine- $^{13}\text{C}_3$ ,  $^{15}\text{N}$  (as part of the stable isotope labeled amino acid mix solution 96378) were purchased from Sigma-Aldrich (St. Louis, MO, USA). Putrescine-d8 and spermidin-d6 trihydrochloride were provided by Toronto Research Chemicals (Toronto, Ontario, Canada). To prepare solutions of putrescine, spermidine, spermine, putrescine-d8 and spermidin-d6, 1.0 mg of the standards were dissolved in methanol-water (1:1, v/v). For the preparation of calibration standards, the reference standard solutions were mixed and dissolved in methanol-water (1:1, v/v) to reach concentrations between 50 nM and 50  $\mu\text{M}$ .

#### **Derivatization procedure**

10  $\mu\text{L}$  of the cell lysates or calibration standards were pipetted into a 1.5 mL vial and mixed with 5  $\mu\text{L}$  of the internal standard solution (2.5  $\mu\text{M}$  of each internal standard in methanol-water (1:1, v/v)) as well as 65  $\mu\text{L}$  methanol, 5  $\mu\text{L}$  water, 10  $\mu\text{L}$  triethylamine and 10  $\mu\text{L}$  phenyl isothiocyanate. Derivatization was performed at room temperature for 30 min, after which, the excess reagent was removed by drying at 60  $^{\circ}\text{C}$  with a gentle stream of nitrogen. The dried samples were dissolved with 50  $\mu\text{L}$  of methanol-water (3:1, v/v).

#### **Liquid chromatography-tandem mass spectrometry**

The LC-MS/MS system consisted of Acquity UPLC H-Class Plus Bio System (Waters, Milford, MA, USA) and a QTrap 6500+ mass spectrometer (Sciex, Framingham, MA, USA). Separations were accomplished on an Eclipse XBD-C18 column (3.5  $\mu\text{m}$ , 3.0  $\times$  100 mm, Agilent) using a ten-minute gradient of 2–98% acetonitrile in aqueous 0.5% acetic acid solution. The flow rate was set to 250  $\mu\text{L}/\text{min}$ , and the column temperature was kept at 50  $^{\circ}\text{C}$ . The injection volume was 10  $\mu\text{L}$ . Mass spectrometry detection was performed with electrospray ionization in positive ion mode. Multiple reaction monitoring was carried out using the precursor-to-product ion transitions summarized in Table S1. The peak area ratios of analyte-specific ions to the corresponding internal standard ions obtained from the calibration standards versus concentrations were used to fit 1/x-weighted linear, least squares regression models. The calibration models were used to calculate the analyte concentrations from the peak area ratios of analyte-specific ions to the corresponding internal standard ions obtained from the samples.

**Table S1.** Multireaction monitoring transitions for the six targets and the corresponding internal standards.

| Target     | Q1 (m/z) | Q3 (m/z) | Internal Standard                               |
|------------|----------|----------|-------------------------------------------------|
| L-arginine | 310      | 217      | Arginine- $^{13}\text{C}_6$                     |
| Ornithine  | 403      | 310      | Methionine- $^{13}\text{C}_5$ , $^{15}\text{N}$ |
| Putrescine | 359      | 266      | Putrescine-D8                                   |
| Spermidine | 551      | 193      | Spermidine-D3                                   |

|                                                            |     |     |               |
|------------------------------------------------------------|-----|-----|---------------|
| Spermine                                                   | 743 | 193 | Spermidine-D3 |
| Arginine- <sup>13</sup> C <sub>6</sub>                     | 316 | 223 |               |
| Methionine- <sup>13</sup> C <sub>5</sub> , <sup>15</sup> N | 291 | 109 |               |
| Serine- <sup>13</sup> C <sub>3</sub> , <sup>15</sup> N     | 245 | 63  |               |
| Putrescine-D8                                              | 367 | 274 |               |
| Spermidine-D3                                              | 557 | 199 |               |

---

## Supplementary Figures

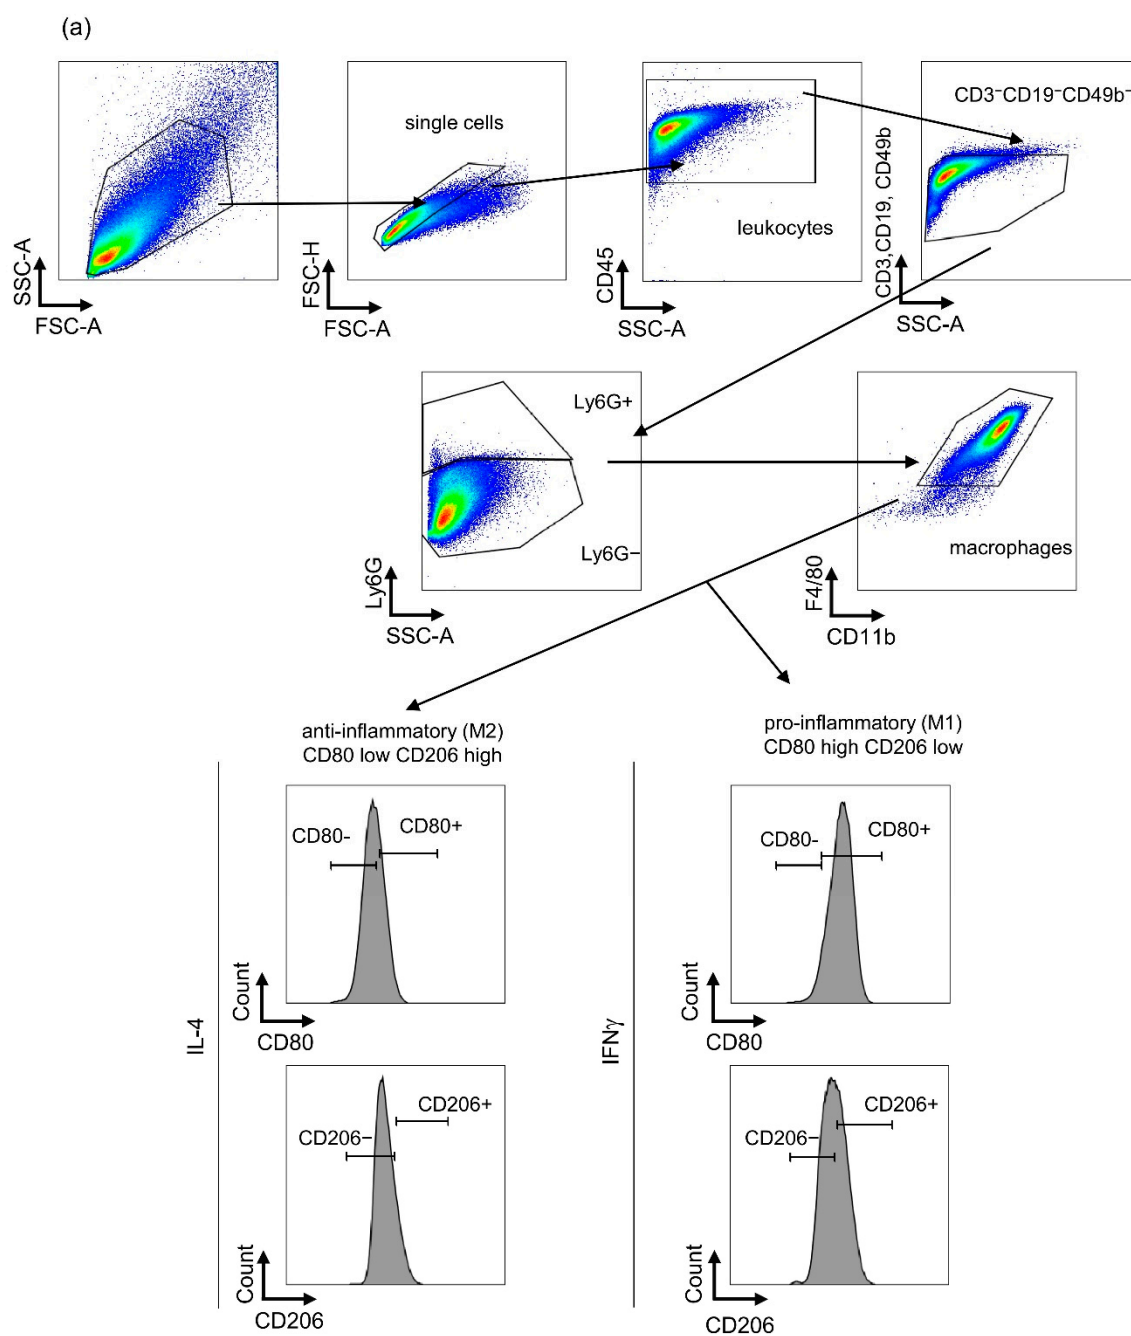

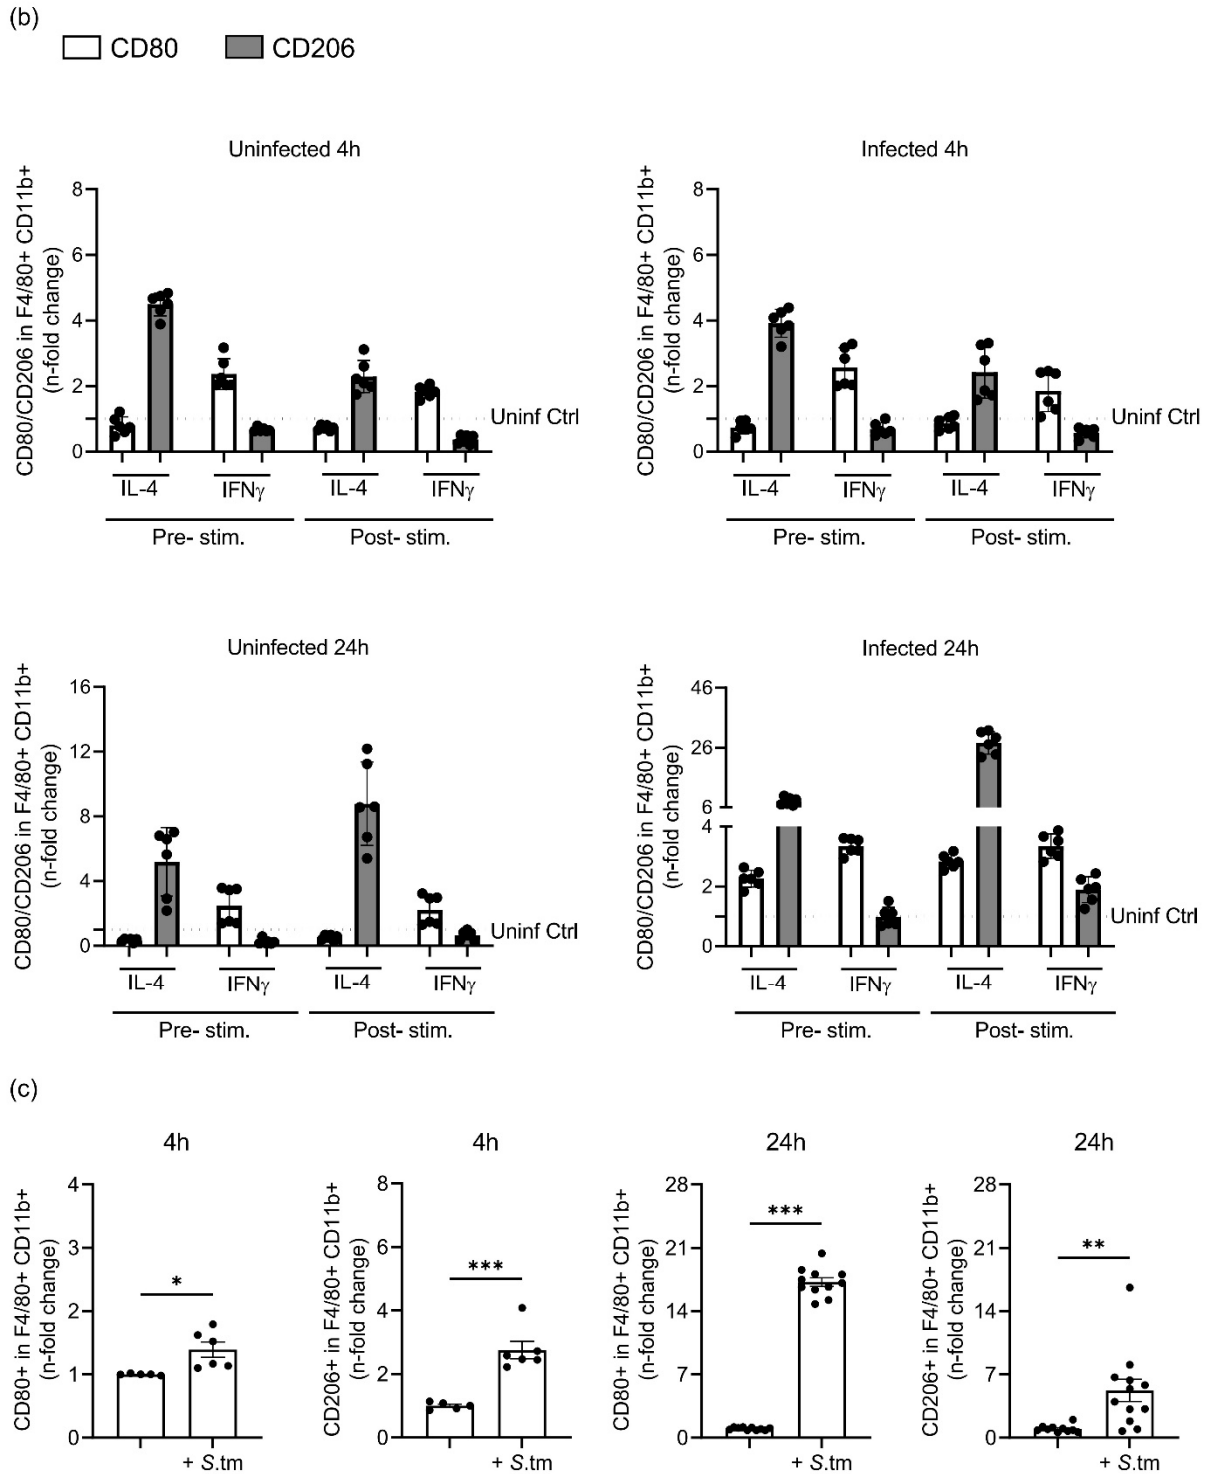

**Figure S1: Gating strategy and regulation of M1 and M2 markers in macrophages due to stimulation and infection with *S.tm*.**

Unpolarised BMDM and pre-stimulated polarised BMDM (2 ng/mL IL-4 or 20 ng/mL IFN $\gamma$ ) were infected with *S.tm* for 1h. Unpolarised cells were then stimulated (post-stimulation) with 10 ng/mL IL-4, 100 ng/mL IFN $\gamma$  or left unstimulated as indicated. (a) Gating strategy to distinguish between pro-inflammatory (M1) and anti-inflammatory (M2) macrophages. (b) M1 and M2 macrophages in uninfected (left) and infected (right) pre- and post-stimulated conditions. M1 macrophages are described as F4/80<sup>+</sup>CD11b<sup>+</sup> CD80<sup>high</sup>CD206<sup>low</sup>, M2 macrophages are

described as F4/80<sup>+</sup>CD11b<sup>+</sup> CD80<sup>low</sup>CD206<sup>high</sup>. (c) Expression of CD80 and CD206 in F4/80<sup>+</sup>CD11b<sup>+</sup> BMDM uninfected and infected with *S.tn* after 4h and 24h. Statistical significance was determined by Student's t-tests (b). \* p-value < 0.05; \*\* p-value < 0.01; \*\*\* p-value < 0.001. Representative data (mean ± SEM) from three independent experiments with 2 technical replications are shown. Data were normalised to the unstimulated uninfected Ctrl.

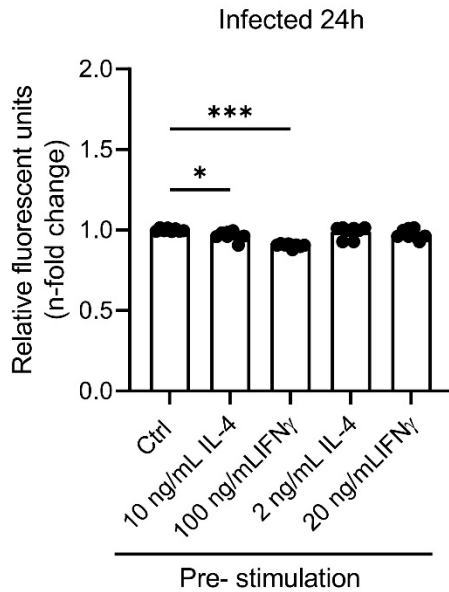

**Figure S2: Measurement of cellular toxicity in infected BMDM pre-stimulated with different concentrations of IL-4 and IFNγ.**

Cytotoxicity of IL-4 and IFNγ was tested by AlamarBlue assay in pre-stimulated BMDM (2 ng/mL IL-4, 20 ng/mL IFNγ or 10 ng/mL IL-4, 100 ng/mL IFNγ). BMDM were infected with *S.tn* for 1h. Supernatant was taken after 24h. Data were normalised to the unstimulated infected Ctrl. Statistical significance was determined by one-way ANOVA with Tukey post hoc test: \* p-value < 0.05; \*\* p-value < 0.01; \*\*\* p-value < 0.001. Representative data (mean ± SEM) from three independent experiments with 2 technical replications are shown.

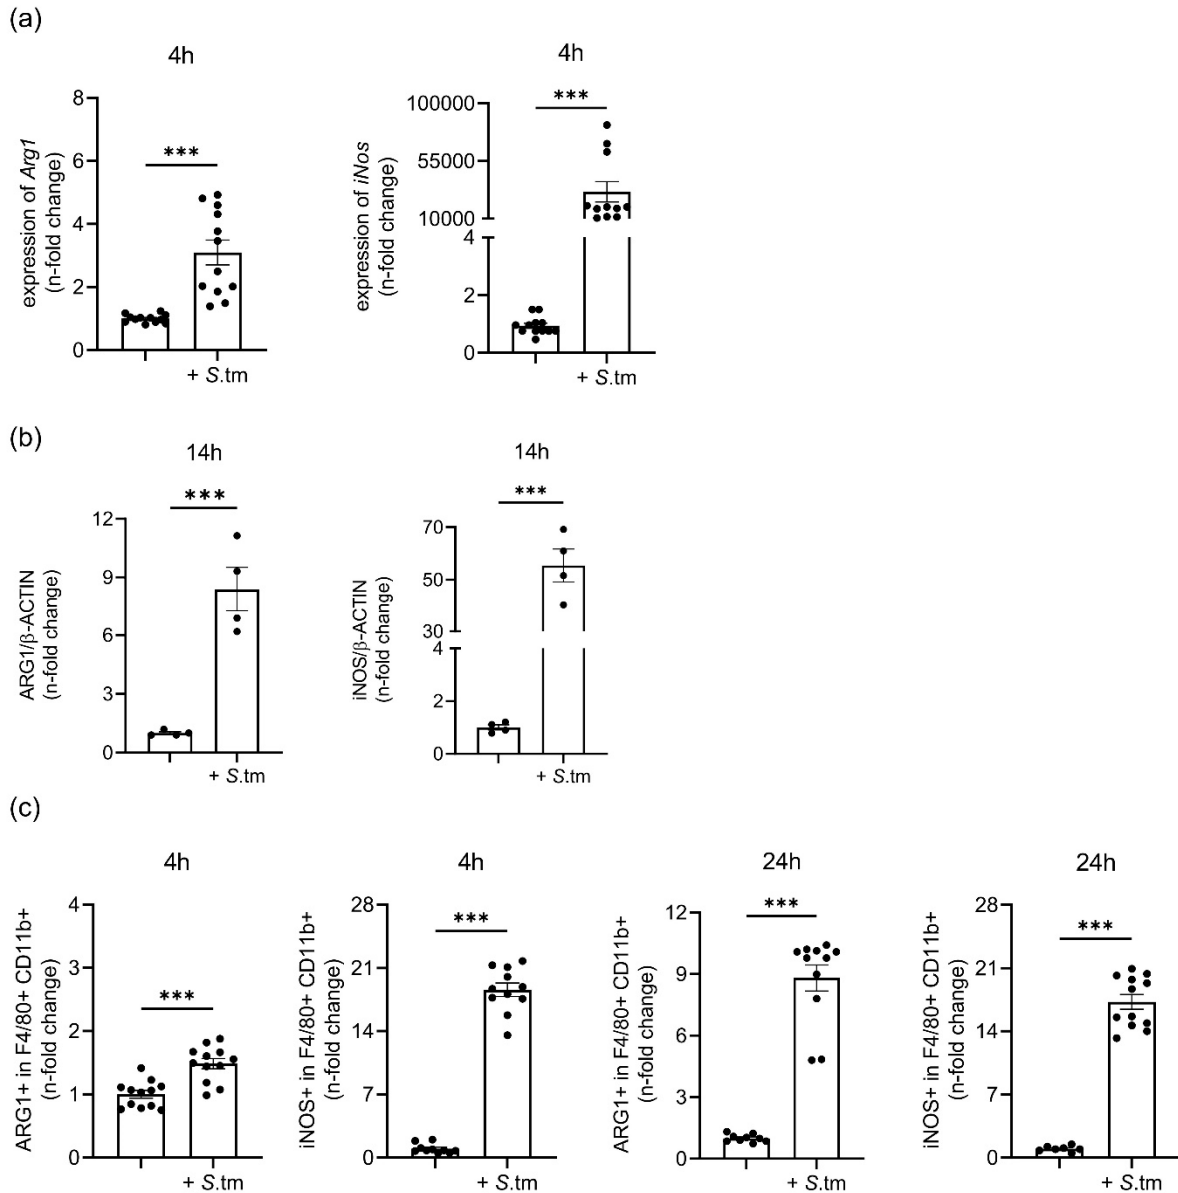

**Figure S3: Gene and protein expression of iNOS and ARG1 in uninfected and S.tm infected controls.**

BMDM were either infected with S.tm for 1h or left uninfected and analysed after 4h and 24h. (a) *Arg1* (left) and *iNos* (right) transcript levels due to infection were determined by quantitative real-time PCR and normalized to Hypoxanthine phosphoribosyltransferase (*Hprt*) mRNA levels using the  $\Delta\Delta CT$  method. (b) Densitometrical quantification of immunoblotting analysis of ARG1 (left) and iNOS (right) relative to  $\beta$ -ACTIN. (c) Percentage of ARG1 and iNOS positive cells in F4/80<sup>+</sup>CD11b<sup>+</sup> cells at different time points of infection.

Statistical significance was determined by Student's t-tests. \*\*\* p-value < 0.001. Representative data (mean  $\pm$  SEM) from three independent experiments are shown.

Data were normalised to the unstimulated uninfected Ctrl.

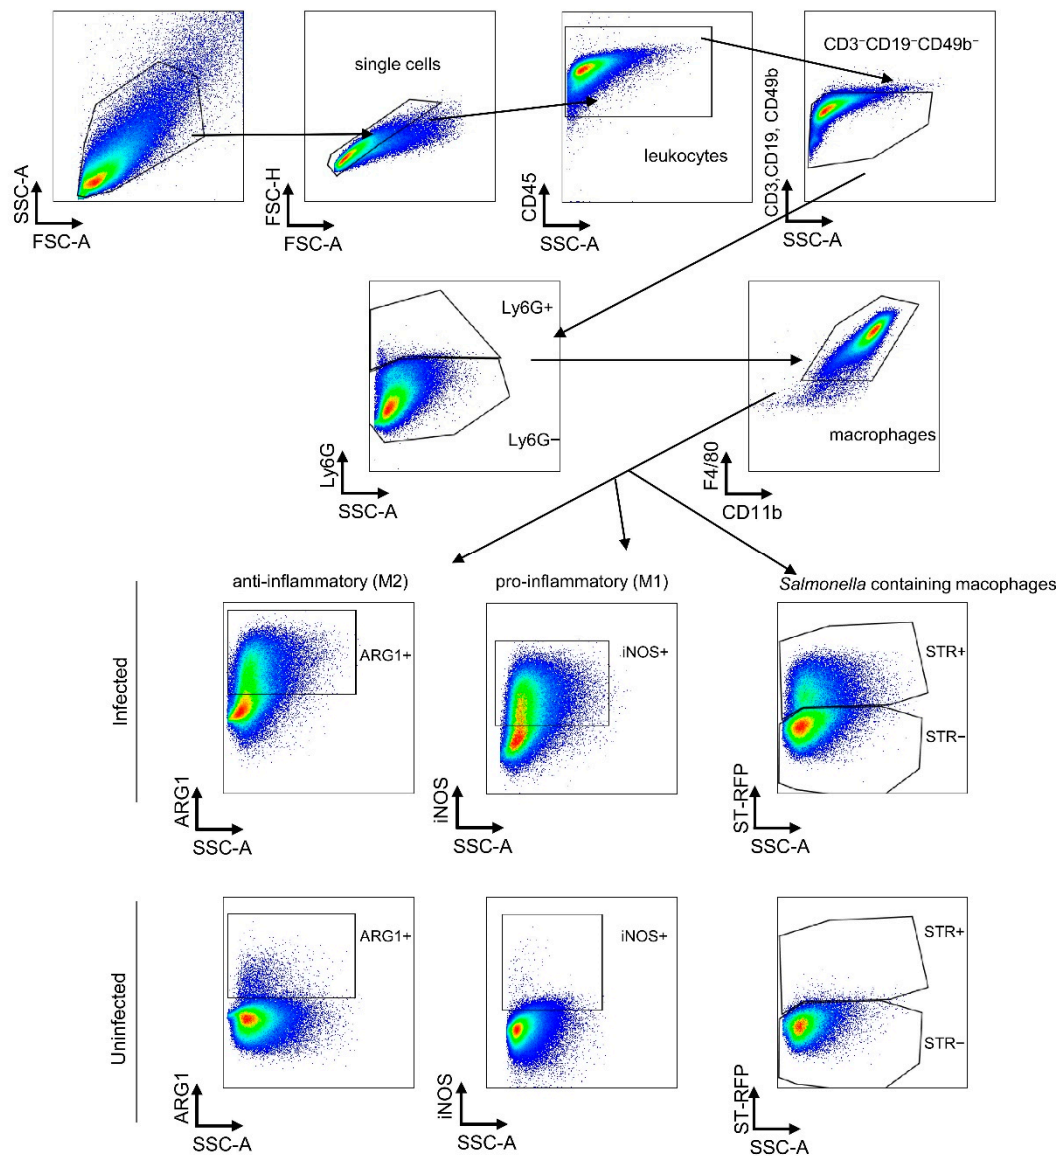

**Figure S4: Gating strategy of iNOS and ARG1 expressing macrophages and macrophages containing *S.tm* expressing RFP (STR).**

BMDM were infected with *S.tm* expressing RFP for 1h and stained with surface markers and intracellular markers. Doublets were excluded and CD45<sup>+</sup> cells were analysed. CD3<sup>+</sup>, CD19<sup>+</sup> and CD49<sup>+</sup> cells as markers for T cells, B cells, and NK cells were excluded. Ly6G<sup>-</sup> cells were analysed for CD11b<sup>+</sup>F4/80<sup>+</sup> macrophage populations. These cells were further analysed for iNOS and ARG1 positive macrophage populations and for macrophages containing RFP expressing *Salmonella*.



stimulation conditions. (b) Percentage of iNOS positive cells in F4/80<sup>+</sup> CD11b<sup>+</sup> cells in uninfected (left) or infected (right) pre-stimulation compared to post-stimulation conditions. (c) Percent of STR positive cells in F4/80<sup>+</sup> CD11b<sup>+</sup> cells in infected pre-stimulation compared to post-stimulation conditions.

Statistical significance was determined by one-way ANOVA with Tukey post hoc test. \* p-value < 0.05; \*\*\* p-value < 0.001. Representative data (mean ± SEM) from three independent experiments with 2 technical replications are shown.

Data were normalised to the unstimulated uninfected Ctrl or, were indicated, to the unstimulated infected Ctrl.
